# Supplementary material
Source: publisher site journal article supplement (https://www.dovepress.com/article/581964)
Supplement: Supplementary file 1 [file 581964_table%20s1_2.docx]

**Appendix Table S1: Bootstrap Resampling and Propensity Score Weighting Sensitivity Analysis Results**

| **Analysis Method** | **Metric** | **Antagonist Protocol (Threshold = 1.45 IU/L)** | **Long Protocol (Threshold = 1.0 IU/L)** |
| --- | --- | --- | --- |
| **Original Analysis** | AUC | 0.664 | 0.655 |
| **Bootstrap Resampling** (2000 iterations) | Mean AUC | 0.662 (95% CI: 0.650–0.675) | 0.653 (95% CI: 0.640–0.668) |
|  | p-value | 0.003 | 0.029 |
|  | Threshold stability | 1.45 IU/L (fluctuation range: ±0.12 IU/L) | 1.00 IU/L (fluctuation range: ±0.08 IU/L) |
| **Propensity Score Weighting** | Adjusted AUC | 0.665 (95% CI: 0.651–0.680) | 0.654 (95% CI: 0.641–0.669) |
|  | p-value | 0.002 | 0.028 |
|  | Standardized mean difference | 0.03 (treatment vs. control) | 0.04 (treatment vs. control) |

*Note: AUC = Area Under the Curve; CI = Confidence Interval. Bootstrap resampling confirmed the stability of threshold effects, with 95% CIs of AUCs overlapping >90% with original results. Propensity score weighting adjusted for confounding variables, showing consistent effect direction and magnitude with unadjusted analyses.*
